# Supplementary material for: Enhancing the quality of bio-oil from catalytic pyrolysis of kraft black liquor lignin
Source: Royal Society of Chemistry journal article supplement (doi:10.1039/c6ra18923g), 2016-01-01
Supplement: c6ra18923g1.pdf [file c6ra18923g1.pdf]

Supplement Table 1 Detailed assignments of  $^{13}\text{C}$ - $^1\text{H}$  correlation signals in the HQSC for kraft lignin

| Lable                                 | $\delta_{\text{C}}/\delta_{\text{H}}$ (ppm) | Assignments                                                                                        |
|---------------------------------------|---------------------------------------------|----------------------------------------------------------------------------------------------------|
| $\text{C}_{\beta}$                    | 53.5/3.4                                    | $\text{C}_{\beta}$ - $\text{H}_{\beta}$ in phenylcoumaran substructures                            |
| $\text{B}_{\beta}$                    | 54.1/3.06                                   | $\text{C}_{\beta}$ - $\text{H}_{\beta}$ in $\beta$ - $\beta$ (resinol) (B)                         |
| $\text{A}_{\gamma}$                   | 58-61/3.1-3.7                               | $\text{C}_{\gamma}$ - $\text{H}_{\gamma}$ in $\beta$ -O-4 substructures (A)                        |
| $\text{C}_{\gamma}$                   | 63.5/3.8                                    | $\text{C}_{\gamma}$ - $\text{H}_{\gamma}$ in phenylcoumaran substructures                          |
| $\text{B}_{\gamma}$                   | 71.4-71.5/3.7-4.2                           | $\text{C}_{\gamma}$ - $\text{H}_{\gamma}$ in $\beta$ - $\beta$ (resinol) (B)                       |
| $\text{A}_{\alpha}$                   | 72.5/4.87                                   | $\text{C}_{\alpha}$ - $\text{H}_{\alpha}$ in $\alpha$ -O-4 substructures linked to a S unit (A)    |
| $\text{A}_{\beta}(\text{G}/\text{H})$ | 81.9/4.76                                   | $\text{C}_{\beta}$ - $\text{H}_{\beta}$ in $\beta$ -O-4 substructures linked to a G unit (A)       |
| $\text{B}_{\alpha}$                   | 85.7/4.62                                   | $\text{C}_{\alpha}$ - $\text{H}_{\alpha}$ in $\beta$ - $\beta$ (resinol) substructures (B)         |
| $\text{A}_{\beta}(\text{S})$          | 86.5/4.12                                   | $\text{C}_{\beta}$ - $\text{H}_{\beta}$ in $\beta$ -O-4 substructures linked to S                  |
| $\text{S}_{2,6}$                      | 105.5/6.52                                  | $\text{C}_{2,6}$ - $\text{H}_{2,6}$ in syringyl units (S)                                          |
| $\text{S}'_{2,6}$                     | 107.6/6.77                                  | $\text{C}_{2,6}$ - $\text{H}_{2,6}$ in oxidized ( $\text{C}\alpha\text{OOH}$ ) syringyl units (S') |
| FA2                                   | 110.2/7.14                                  | $\text{C}_2$ - $\text{H}_2$ in ferulate                                                            |
| $\text{G}_2$                          | 112.8/6.85                                  | $\text{C}_2$ - $\text{H}_2$ in guaiacyl units (G)                                                  |
| $\text{G}_5$                          | 116.0/6.76                                  | $\text{C}_5$ - $\text{H}_5$ in guaiacyl units (G)                                                  |
| $\text{G}_6$                          | 119.8/6.94                                  | $\text{C}_6$ - $\text{H}_6$ in guaiacyl units (G)                                                  |
| $\text{H}_{2,6}$                      | 126-127/7.2-7.3                             | $\text{C}_{2,6}$ - $\text{H}_{2,6}$ in p-hydroxyphenyl units (H)                                   |
| $\text{X}_2$                          | 73.1/3.06                                   | $\text{C}_2$ - $\text{H}_2$ in $\beta$ -D-xylopyranoside                                           |
| $\text{X}_3$                          | 74.4/3.26                                   | $\text{C}_3$ - $\text{H}_3$ in $\beta$ -D-xylopyranoside                                           |
| $\text{X}_4$                          | 75.9/3.52                                   | $\text{C}_4$ - $\text{H}_4$ in $\beta$ -D-xylopyranoside                                           |
| $\text{X}_5$                          | 63.3/3.40                                   | $\text{C}_5$ - $\text{H}_5$ in $\beta$ -D-xylopyranoside                                           |

Supplement Table 2 Quantified yield of monophenols from kraft lignin catalytic pyrolysis under different reaction regimes

| Compounds                 | Yield (wt %)   |      |                                |                  |                                     |      |                                |                  |
|---------------------------|----------------|------|--------------------------------|------------------|-------------------------------------|------|--------------------------------|------------------|
|                           | N <sub>2</sub> |      |                                |                  | H <sub>2</sub> /N <sub>2</sub> =1/9 |      |                                |                  |
|                           | Blank          | NiO  | Co <sub>3</sub> O <sub>4</sub> | MoO <sub>2</sub> | Blank                               | NiO  | Co <sub>3</sub> O <sub>4</sub> | MoO <sub>2</sub> |
| 2-methoxy-Phenol          | 0.56           | 0.44 | 0.51                           | 0.43             | 0.42                                | 0.45 | 0.37                           | 0.57             |
| 2-methoxy-4-methyl-Phenol | 0.65           | 0.50 | 0.63                           | 0.54             | 0.48                                | 0.52 | 0.43                           | 0.70             |
| 4-ethyl-2-methoxy-Phenol  | 0.31           | 0.24 | 0.28                           | 0.24             | 0.21                                | 0.23 | 0.18                           | 0.29             |
| 2,6-dimethoxy-Phenol      | 2.56           | 2.06 | 2.42                           | 2.19             | 1.94                                | 1.98 | 1.62                           | 2.76             |
| Total                     | 4.08           | 3.24 | 3.84                           | 3.40             | 3.05                                | 3.18 | 2.60                           | 4.32             |
